# Supplementary material for: Enhancement of hepatocyte differentiation from human embryonic stem cells by Chinese medicine Fuzhenghuayu
Source: PubMed Central journal article supplement (PMC4702137; doi:10.1038/srep18841), 2016-01-06
Supplement: srep18841-s1.pdf [file srep18841-s1.pdf]

**Enhancement of hepatocyte differentiation from human embryonic stem cells by Chinese medicine Fuzhenghuayu**

Jiamei Chen<sup>1-4</sup> Wei Gao<sup>2,3,5</sup> Ping Zhou<sup>2,3</sup> Xiaocui Ma<sup>2,3</sup> Benjamin Tschudy-Seney<sup>2,3</sup> Chenghai Liu<sup>1</sup>, Mark A Zern<sup>2,3</sup> Ping Liu<sup>1</sup>, Yuyou Duan<sup>2-4</sup>

<sup>1</sup>Institute of Liver Diseases, Shuguang Hospital, Shanghai University of Traditional Chinese Medicine, Shanghai, China

<sup>2</sup>Department of Internal Medicine, <sup>3</sup>Institute for Regenerative Cures, <sup>4</sup>Department of Dermatology, University of California Davis Medical Center, Sacramento, California, USA

<sup>5</sup>Institute of Biophysics, the Chinese Academy of Science, Beijing, China

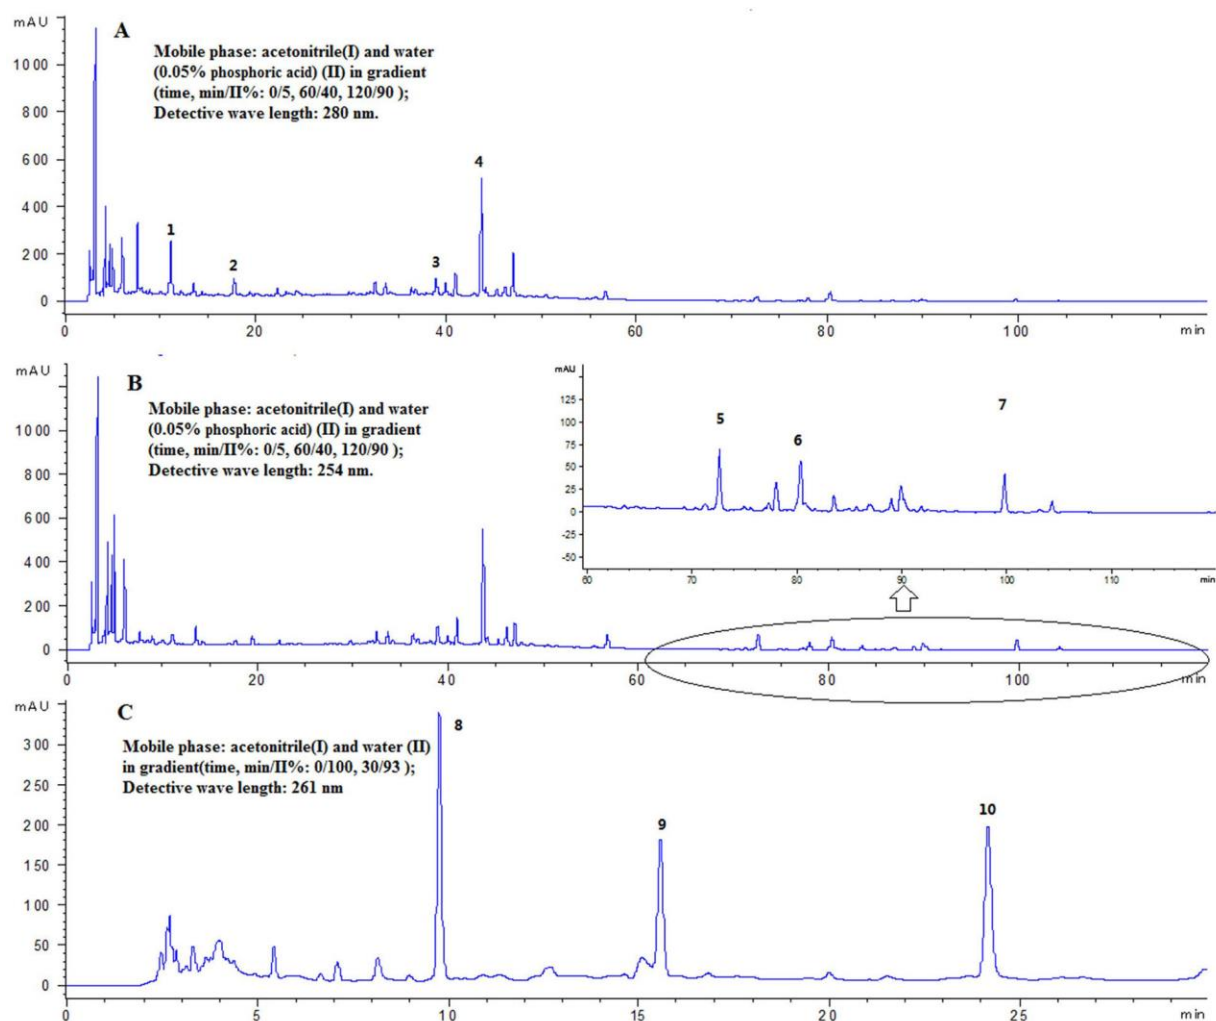

**Suppl. Figure 1. The chromatographic profile of FZHY extracts.** In a previous study, ten compounds have been identified in FZHY according to the optimized mobile phase employing the chromatography technology, and the chromatographic profiling of FZHY was shown as above. (Stationary phase: CNW Athena C<sub>18</sub>– WP (4.6mm × 150mm, 3μm), flow rate: 1 mL/min). (Each compound indicated by peak number: 1. danshensu; 2. protocatechuic aldehyde; 3. rosmarinic acid 4. salvianolic acid B; 5. schizandrol A; 6. schizandrol B; 7. schizandrin A; 8. uridine 9. guanosine; 10. adenosine;) [Supplementary Reference 1]

### Suppl. Reference 1

1. Yang T, Shen DP, Wang QL et al. Investigation of the absorbed and metabolized components of Danshen from Fuzheng Huayu recipe and study on the anti-hepatic fibrosis effects of these components. *J Ethnopharmacol* 2013;148:691-700.

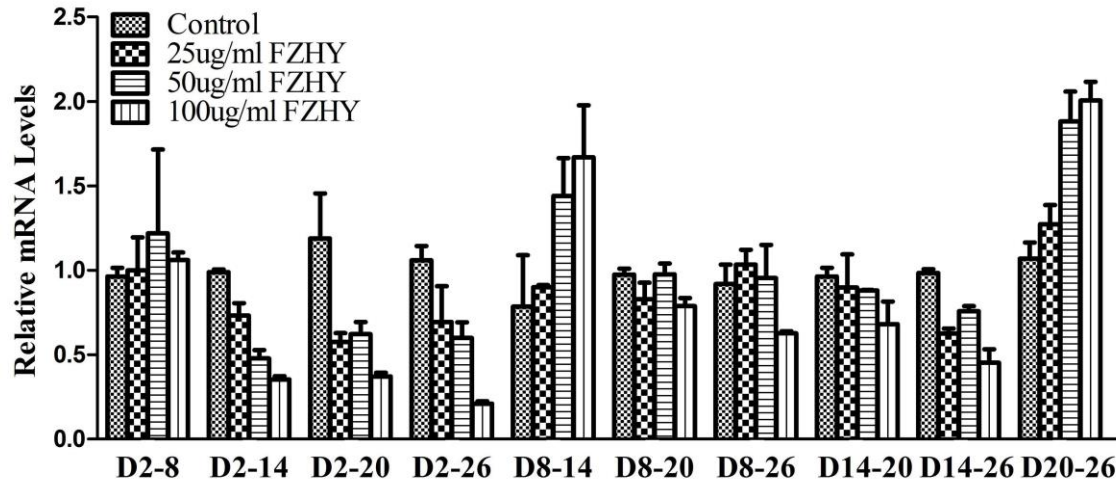

**Suppl. Figure 2. Optimization of the treatment with FZHY during hepatocyte differentiation.** hESC line, H9 was used in our standard differentiate protocol, and FZHY was added to the culture medium at day 2, 8, 14, 20 of differentiation respectively at different concentrations 25, 50, 100 $\mu$ g/ml, and the cells were collected every 6 days. The relative expression levels of albumin (ALB) was measured by qPCR, and compared to the control groups. Data represent mean  $\pm$  SEM.

| Layout              | 01               | 02              | 03              | 04               | 05               | 06               | 07              | 08              | 09               | 10               | 11               | 12               |
|---------------------|------------------|-----------------|-----------------|------------------|------------------|------------------|-----------------|-----------------|------------------|------------------|------------------|------------------|
| A<br>100 ug/ml FZHY | AADAC<br>2.04    | ADH1A<br>1.40   | ADH1B<br>-1.27  | ADH1C<br>-1.16   | ADH4<br>-1.11    | ADH5<br>1.21     | ADH6<br>1.56    | ADH7<br>1.56    | ALDH1A1<br>1.22  | ALDH1A2<br>2.74  | ALDH1A3<br>-1.27 | ALDH1B1<br>-1.26 |
| B<br>100 ug/ml FZHY | ALDH2<br>1.20    | ALDH3A1<br>1.61 | ALDH3A2<br>1.29 | ALDH3B1<br>1.78  | ALDH3B2<br>-1.55 | ALDH4A1<br>1.37  | ALDH5A1<br>1.31 | ALDH6A1<br>1.37 | ALDH7A1<br>1.09  | ALDH8A1<br>1.50  | ALDH9A1<br>-1.04 | CEL<br>1.38      |
| C<br>100 ug/ml FZHY | CYP11A1<br>-2.52 | CYP11B1<br>1.56 | CYP11B2<br>1.56 | CYP17A1<br>-1.33 | CYP19A1<br>1.46  | CYP1A1<br>2.97   | CYP1A2<br>2.77  | CYP1B1<br>1.10  | CYP21A2<br>-1.30 | CYP24A1<br>-3.74 | CYP26A1<br>-1.16 | CYP26B1<br>1.34  |
| D<br>100 ug/ml FZHY | CYP26C1<br>1.11  | CYP27A1<br>1.26 | CYP27B1<br>1.21 | CYP2A13<br>-2.16 | CYP2B6<br>-1.24  | CYP2C18<br>-1.08 | CYP2C19<br>2.65 | CYP2C8<br>1.72  | CYP2C9<br>1.95   | CYP2D6<br>1.25   | CYP2E1<br>-1.44  | CYP2F1<br>2.49   |
| E<br>100 ug/ml FZHY | CYP2R1<br>1.10   | CYP2S1<br>1.16  | CYP2W1<br>3.11  | CYP3A4<br>1.31   | CYP3A43<br>1.66  | CYP3A5<br>2.31   | CYP3A7<br>2.31  | CYP4A11<br>1.29 | CYP4A22<br>4.38  | CYP4B1<br>1.33   | CYP4F11<br>3.55  | CYP4F12<br>1.94  |
| F<br>100 ug/ml FZHY | CYP4F2<br>-1.90  | CYP4F3<br>1.60  | CYP4F8<br>1.56  | CYP7A1<br>1.85   | CYP7B1<br>1.67   | CYP8B1<br>1.13   | DHRS2<br>-1.13  | DPYD<br>1.77    | ESD<br>1.38      | FMO1<br>1.09     | FMO2<br>1.85     | FMO3<br>2.26     |
| G<br>100 ug/ml FZHY | FMO4<br>1.34     | FMO5<br>1.79    | GZMA<br>6.27    | GZMB<br>2.37     | HSD17B10<br>1.30 | MAOA<br>1.19     | MAOB<br>1.58    | PTGS1<br>2.78   | PTGS2<br>1.29    | UCHL1<br>-1.18   | UCHL3<br>1.38    | XDH<br>1.26      |

**Suppl. Figure 3. PCR Array Analysis of Human Drug Metabolism.** The 84 genes used in Human Drug Metabolism PCR Array present Phase I Enzymes, and their expression fold change compared to the control group.

The expression changes of 84 genes involved in phase I drug metabolism reactions including oxidation, reduction, hydrolysis, cyclization, and decyclization by PCR Array (PAHS-068Z, Sabiosciences) analysis at day 14 of differentiation of hESCs treated with or without FZHY. The name of each gene and its expression fold change compared to the control group is shown in the same grid. The genes and their representative Drug Metabolism Phase I Enzymes can be found at Sabiosciences website ([http://www.sabiosciences.com/rt\\_pcr\\_product/HTML/PAHS-068Z.html](http://www.sabiosciences.com/rt_pcr_product/HTML/PAHS-068Z.html)).

| Layout                     | 01             | 02            | 03              | 04            | 05              | 06            | 07               | 08              | 09              | 10             | 11               | 12              |
|----------------------------|----------------|---------------|-----------------|---------------|-----------------|---------------|------------------|-----------------|-----------------|----------------|------------------|-----------------|
| <b>A</b><br>100 ug/ml FZHY | ACSL3<br>1.26  | ACSL4<br>1.46 | ACSL5<br>1.45   | ADM<br>1.20   | ARNT<br>1.08    | ATF4<br>1.26  | AXIN2<br>-1.11   | BAX<br>2.94     | BBC3<br>1.43    | BCL2<br>-1.01  | BCL2A1<br>1.47   | BCL2L1<br>1.26  |
| <b>B</b><br>100 ug/ml FZHY | BIRC3<br>1.13  | BMP2<br>1.17  | BMP4<br>1.02    | BTG2<br>-1.18 | CA9<br>-1.48    | CCL5<br>-1.38 | CCND1<br>1.13    | CCND2<br>-1.21  | CDKN1A<br>-2.02 | CDKN1B<br>1.34 | CEBPD<br>1.67    | CPT2<br>-1.03   |
| <b>C</b><br>100 ug/ml FZHY | CSF1<br>1.25   | DAB2<br>1.06  | EGFR<br>1.50    | EMP1<br>-2.90 | EPO<br>1.64     | FABP1<br>1.39 | FAS<br>-1.12     | FCER2<br>1.65   | FOSL1<br>-1.29  | FTH1<br>1.14   | GADD45A<br>-1.29 | GADD45B<br>1.32 |
| <b>D</b><br>100 ug/ml FZHY | GATA3<br>-1.14 | GCLC<br>-1.71 | GCLM<br>1.39    | GSR<br>-1.39  | HERPUD1<br>2.07 | HES1<br>-4.94 | HES5<br>1.77     | HEY1<br>1.18    | HEY2<br>1.71    | HEYL<br>1.01   | HMOX1<br>1.35    | ICAM1<br>-1.03  |
| <b>E</b><br>100 ug/ml FZHY | ID1<br>1.02    | IFNG<br>-1.25 | IFRD1<br>1.14   | IRF1<br>2.14  | JAG1<br>-1.04   | LDHA<br>1.17  | LFNG<br>2.21     | LRG1<br>1.51    | MCL1<br>1.45    | MMP7<br>-1.15  | MYC<br>1.63      | NOTCH1<br>-1.15 |
| <b>F</b><br>100 ug/ml FZHY | NQO1<br>1.54   | OLR1<br>1.62  | PCNA<br>1.02    | PPARD<br>1.81 | PTCH1<br>1.22   | RB1<br>1.27   | SERPINE1<br>1.06 | SLC27A4<br>1.31 | SLC2A1<br>1.12  | SOC3<br>-1.40  | SORBS1<br>1.09   | SQSTM1<br>1.11  |
| <b>G</b><br>100 ug/ml FZHY | STAT1<br>1.80  | TNF<br>-1.33  | TNFSF10<br>2.21 | TXN<br>1.28   | TXNRD1<br>1.51  | VEGFA<br>1.22 | WISP1<br>6.68    | WNT1<br>1.19    | WNT2B<br>-1.15  | WNT3A<br>1.11  | WNT5A<br>1.31    | WNT6<br>-2.47   |

**Supple. Figure 4. PCR Array Analysis of Signaling Pathways.** The 84 genes used in Signal Transduction PathwayFinder PCR Array present different pathways, and their expression fold change compared to the control group.

The expression changes of 84 genes representing 10 signaling pathways by PCR Array (PAHS-014Z, Sabiosciences) analysis at day 14 of differentiation of hESCs treated with or without FZHY at the concentration of 100 µg/ml. The name of each gene and its expression fold change compared to those without FZHY is shown in the same grid. The genes and their representative pathways can be found at Sabiosciences website

([http://www.sabiosciences.com/rt\\_pcr\\_product/HTML/PAHS-014Z.html](http://www.sabiosciences.com/rt_pcr_product/HTML/PAHS-014Z.html)).

| Chinese name | Plant sources                                                     | Medicinal parts | Amount in preparation (g) |
|--------------|-------------------------------------------------------------------|-----------------|---------------------------|
| Danshen      | <i>Salvia Miltiorrhizae</i> Bge. (Labiatae)                       | radix           | 8                         |
| Chongcao     | artificial fermentation cordyceps                                 | mycelia         | 4                         |
| Taoren       | <i>Prunus persica</i> (L.) Batsch(Rosaceae)                       | fruit           | 2                         |
| Jiaogulan    | <i>Gynostemma pentaphyllum</i> (Thunb.) Makino<br>(Cucurbitaceae) | whole herb      | 6                         |
| Songhuafen   | <i>Pinus massoniana</i> Lamb.(Pinaceae)                           | pollen          | 2                         |
| Wuweizi      | <i>Schisandrae Chinensis</i> (Turcz.)<br>Baill.(Magnoliaceae)     | fruit           | 2                         |

**Suppl. Table 1. The formula of Fuzhenghuayu per dose**

| Genes         | Information or sequences of primers                                    | Application |
|---------------|------------------------------------------------------------------------|-------------|
| Albumin       | Hs00609411_m1 (Applied Biosystems)                                     | TaqMan      |
| E-cadherin    | Hs01013958_m1 (Applied Biosystems)                                     | TaqMan      |
| CK7           | Hs00559840_m1 (Applied Biosystems)                                     | TaqMan      |
| N-cadherin    | Hs00169953_m1 (Applied Biosystems)                                     | TaqMan      |
| ASGPR         | Hs00155881_m1 (Applied Biosystems)                                     | TaqMan      |
| Desmin        | Hs00157258_m1 (Applied Biosystems)                                     | TaqMan      |
| $\alpha$ -SMA | Hs00426835_m1 (Applied Biosystems)                                     | TaqMan      |
| Vimentin      | Hs00185584_m1 (Applied Biosystems)                                     | TaqMan      |
| Ki67          | Hs01032443_m1 (Applied Biosystems)                                     | Taqman      |
| Snail 1       | Hs00195591_m1 (Applied Biosystems)                                     | TaqMan      |
| Twist         | Hs01675818_s1 (Applied Biosystems)                                     | TaqMan      |
| CYP1A2        | Hs00167927_m1 (Applied Biosystems)                                     | TaqMan      |
| CYP2C9        | Hs00426397_m1 (Applied Biosystems)                                     | TaqMan      |
| CYP2C19       | Hs00426380_m1 (Applied Biosystems)                                     | TaqMan      |
| UTG1A1        | Hs02511055_s1 (Applied Biosystems)                                     | TaqMan      |
| UTG1A3        | Hs04194492_g1 (Applied Biosystems)                                     | TaqMan      |
| UTG1A6        | Hs01592477_m1 (Applied Biosystems)                                     | TaqMan      |
| UTG1A8        | Hs01592482_m1 (Applied Biosystems)                                     | TaqMan      |
| UTG1A10       | Hs02516990_s1 (Applied Biosystems)                                     | TaqMan      |
| UTG2B7        | Hs00426592_m1 (Applied Biosystems)                                     | TaqMan      |
| Glut2         | Hs01096908_m1 (Applied Biosystems)                                     | TaqMan      |
| TAT           | Hs00356930_m1 (Applied Biosystems)                                     | TaqMan      |
| GAPDH         | Hs99999905_m1 (Applied Biosystems)                                     | TaqMan      |
| Wnt1          | F:5'- CTGCAGCGACAACATTGACTT-3'<br>R:5'- GTTGTTGTGAAGGTTTCATGAGG-3'     | SYBR        |
| cyclin D1     | F: 5'-GGTCTGCGAGGAACAGAAGTG-3'<br>R: 5'-TGCAGGCGGCTCTTTTTC-3'          | SYBR        |
| c-Myc         | F:5'-AGCTCATTCTGAAGAGGACTTGT-3'<br>R:5'-TTGAGGCAGTTTACATTATGGCTA-3'    | SYBR        |
| TCF1          | F: 5'-CCCTACTTTTTATCCCTTGTCTCC-3'<br>R: 5'-CTGAGGTGTTACAATAGCTGGATG-3' | SYBR        |

|          |                                                               |      |
|----------|---------------------------------------------------------------|------|
| GAPDH    | F: 5'-GAAGATGGTGATGGGATTTC-3'<br>R: 5'-GAAGGTGAAGGTCGGAGTC-3' | SYBR |
| Notch1   | F: GGCCAGAACTGTGAGGAAAATATC<br>R: ACAGTACTGACCTGTCCACTCTGG    | SYBR |
| Notch4   | F: CTGTAGTGAGGAGATGACAGCTTG<br>R: GACACACAGTAGTCAGTGCTGGTT    | SYBR |
| DLL1     | F: GTACTGTGACGAGTGTATCCGCTA<br>R: GGCTTATGGTGTGTGCAGTAGTTC    | SYBR |
| DLL3     | F: ACTCAACAACCTAAGGACGCAG<br>R: GCGTAGATGGAAGGAGCAGATA        | SYBR |
| Jagged 2 | F: ACGAGAACTACTACAGCGCCACTT<br>R: TACACACAGCTTCCTTGCACTC      | SYBR |
| Hes1     | F: CTGAGCACAGAAAGTCATCAAAGC<br>R: GAGCTATCTTTCTTCAGAGCATCC    | SYBR |
| Hes5     | F: TCAGCTACCTGAAGCACAGCAAAG<br>R: TGGAAGTGGTACAGCAGCTTCATC    | SYBR |
| Wnt2     | F: ATCTCTGGAGGAAGTACAATGGGG<br>R: TCTCGGTCCCTGATACAGTAGTCT    | SYBR |
| Wnt3a    | F: GACTTCCTCAAGGACAAGTACGAC<br>R: TGGGCACCTTGAAGTAGGTGTA      | SYBR |
| Wnt7a    | F: AGATCCTGGAGGAGAACATGAAGC<br>R: CGTTGTACTTGTCCCTTGAGCACGT   | SYBR |
| Wnt7b    | F: CACCTGCTGAAGGAGAAGTACAAC<br>R: CTCAATGTACACCAGGTCTGTCTC    | SYBR |
| Wnt10b   | F: GGGCCATCTTCATTGATACCCACA<br>R: GGAGACTTCTCAAAGTAGACCAGC    | SYBR |

**Suppl. Table 2. Information of primers and probes used**

Abbreviations: ASGPR: asialoglycoprotein receptor;  $\alpha$ -SMA, alpha smooth muscle actin; CYP, cytochrome P450; UGT, UDP-glucuronosyl-S-transferase; Glut2, glucose transporter protein 2; TAT, tyrosine aminotransferase; GAPDH, glyceraldehyde-3-phosphate dehydrogenase; TCF1, T-cell factor 1; DLL1, Delta-like 1; DLL3, Delta-like 3; Hes1, hairy and enhancer of split-1; Hes5, hairy and enhancer of split 5.



| Antigen                         | Type              | Provider                  | Application |
|---------------------------------|-------------------|---------------------------|-------------|
| Albumin                         | Goat polyclonal   | Bethyl                    | IHC         |
| Ki67                            | Rabbit polyclonal | Abcam                     | IHC         |
| ERK                             | Rabbit polyclonal | Cell Signaling Technology | WB          |
| p-ERK                           | Rabbit polyclonal | Cell Signaling Technology | WB          |
| cyclin D1                       | mouse monoclonal  | Cell Signaling Technology | WB          |
| TCF1                            | Rabbit polyclonal | Cell Signaling Technology | WB          |
| Wnt1                            | Rabbit polyclonal | GeneTex                   | WB          |
| Histone H3K27<br>Trimethylation | Rabbit polyclonal | Epigentek                 | WB          |
| $\beta$ -catenin                | Rabbit monoclonal | Cell Signaling Technology | WB          |
| Numb                            | Rabbit monoclonal | Cell Signaling Technology | WB          |
| Hes1                            | Rabbit monoclonal | Genetex                   | WB          |
| Jagged2                         | Rabbit monoclonal | Cell Signaling Technology | WB          |
| N-cadherin                      | Rabbit monoclonal | Cell Signaling Technology | WB          |
| Vimentin                        | Rabbit monoclonal | Cell Signaling Technology | WB          |
| c-Myc                           | Rabbit monoclonal | Santa cruz                | WB          |
| GAPDH                           | mouse monoclonal  | Abcam                     | WB          |

**Suppl. Table 3. List of antibodies used**

Abbreviations: ERK, extracellular signal-regulated kinase; p-ERK, phosphorylated ERK; TCF1, T-cell factor 1; Hes1, hairy and enhancer of split-1; GAPDH, glyceraldehyde-3-phosphate dehydrogenase.
